# Supplementary material for: Pro-apoptotic gene BAX is a pan-cancer predictive biomarker for prognosis and immunotherapy efficacy
Source: publisher site journal article supplement (doi:10.18632/aging.206003), 2024-07-05
Supplement: Supplementary file [file aging-v16i14-206003-supplementary-material-SD2.pdf]

## SUPPLEMENTARY TABLE

**Supplementary Table 1. Box plot representation of BAX expression level comparison in pan-cancer (TCGA project) relative to the corresponding normal tissues (GTEx database).**

| Group1 | Group2 | Number | Min   | Max   | Median | IQR   | Mean  | SD    | SE    |
|--------|--------|--------|-------|-------|--------|-------|-------|-------|-------|
| ACC    | Normal | 128    | 0     | 6.963 | 6.088  | 0.562 | 5.95  | 0.794 | 0.07  |
| ACC    | Tumor  | 77     | 3.252 | 8.108 | 6.536  | 0.909 | 6.519 | 0.818 | 0.093 |
| BLCA   | Normal | 28     | 5.423 | 7.604 | 6.271  | 0.697 | 6.291 | 0.528 | 0.1   |
| BLCA   | Tumor  | 407    | 4.535 | 8.917 | 7.293  | 0.742 | 7.292 | 0.591 | 0.029 |
| BRCA   | Normal | 292    | 3.291 | 6.649 | 5.639  | 0.607 | 5.576 | 0.526 | 0.031 |
| BRCA   | Tumor  | 1099   | 3.892 | 8.203 | 6.532  | 0.68  | 6.507 | 0.563 | 0.017 |
| CESC   | Normal | 13     | 5.851 | 6.425 | 6.061  | 0.278 | 6.104 | 0.182 | 0.05  |
| CESC   | Tumor  | 306    | 4.782 | 8.421 | 7.342  | 0.582 | 7.271 | 0.471 | 0.027 |
| CHOL   | Normal | 9      | 4.72  | 5.529 | 5.022  | 0.086 | 5.069 | 0.231 | 0.077 |
| CHOL   | Tumor  | 36     | 5.177 | 9.011 | 7.43   | 0.801 | 7.418 | 0.696 | 0.116 |
| COAD   | Normal | 349    | 0     | 7.804 | 6.087  | 0.99  | 6.097 | 0.919 | 0.049 |
| COAD   | Tumor  | 290    | 3.392 | 8.879 | 7.354  | 0.681 | 7.275 | 0.715 | 0.042 |
| DLBC   | Normal | 444    | 1.978 | 9.138 | 6.061  | 2.068 | 6.175 | 1.389 | 0.066 |
| DLBC   | Tumor  | 47     | 6.135 | 9.338 | 8.174  | 0.687 | 8.104 | 0.575 | 0.084 |
| ESCA   | Normal | 666    | 0     | 7.138 | 5.746  | 0.644 | 5.713 | 0.698 | 0.027 |
| ESCA   | Tumor  | 182    | 4.323 | 7.134 | 5.65   | 0.723 | 5.671 | 0.511 | 0.038 |
| GBM    | Normal | 1157   | 0     | 7.38  | 4.821  | 0.903 | 4.72  | 0.838 | 0.025 |
| GBM    | Tumor  | 166    | 4.848 | 8.591 | 7.32   | 0.74  | 7.303 | 0.586 | 0.045 |
| HNSC   | Normal | 44     | 2.807 | 7.176 | 5.855  | 0.554 | 5.794 | 0.757 | 0.114 |
| HNSC   | Tumor  | 520    | 5.07  | 8.387 | 6.786  | 0.619 | 6.78  | 0.496 | 0.022 |
| KICH   | Normal | 53     | 0     | 7.401 | 5.954  | 0.824 | 5.683 | 1.118 | 0.154 |
| KICH   | Tumor  | 66     | 3.573 | 7.781 | 5.663  | 1.011 | 5.693 | 0.71  | 0.087 |
| KIRC   | Normal | 100    | 0     | 7.143 | 5.66   | 0.661 | 5.561 | 0.844 | 0.084 |
| KIRC   | Tumor  | 531    | 3.599 | 8.14  | 6.718  | 0.703 | 6.635 | 0.626 | 0.027 |
| KIRP   | Normal | 60     | 0     | 6.887 | 5.692  | 0.831 | 5.589 | 1.019 | 0.131 |
| KIRP   | Tumor  | 289    | 5.403 | 8.506 | 7.262  | 0.747 | 7.188 | 0.595 | 0.035 |
| LAML   | Normal | 70     | 5.204 | 6.363 | 5.971  | 0.323 | 5.97  | 0.246 | 0.029 |
| LAML   | Tumor  | 173    | 4.544 | 8.205 | 6.032  | 0.936 | 6.067 | 0.639 | 0.049 |
| LGG    | Normal | 1152   | 0     | 7.38  | 4.816  | 0.903 | 4.716 | 0.836 | 0.025 |
| LGG    | Tumor  | 523    | 4.592 | 8.423 | 6.402  | 0.748 | 6.474 | 0.606 | 0.026 |
| LIHC   | Normal | 160    | 2.795 | 7.344 | 4.658  | 0.881 | 4.753 | 0.742 | 0.059 |
| LIHC   | Tumor  | 371    | 3.638 | 8.747 | 6.318  | 0.987 | 6.341 | 0.759 | 0.039 |
| LUAD   | Normal | 347    | 0     | 8.085 | 6.654  | 0.594 | 6.605 | 0.632 | 0.034 |
| LUAD   | Tumor  | 515    | 3.561 | 8.247 | 6.661  | 0.696 | 6.623 | 0.565 | 0.025 |
| LUSC   | Normal | 338    | 0     | 8.085 | 6.681  | 0.588 | 6.63  | 0.639 | 0.035 |
| LUSC   | Tumor  | 498    | 4.489 | 8.215 | 6.846  | 0.703 | 6.811 | 0.506 | 0.023 |
| MESO   | Tumor  | 87     | 6.106 | 8.263 | 7.216  | 0.913 | 7.178 | 0.597 | 0.064 |

|      |        |     |       |       |       |       |       |       |       |
|------|--------|-----|-------|-------|-------|-------|-------|-------|-------|
| OV   | Normal | 88  | 4.542 | 6.417 | 5.408 | 0.546 | 5.436 | 0.391 | 0.042 |
| OV   | Tumor  | 427 | 0     | 7.388 | 5.778 | 0.808 | 5.747 | 0.691 | 0.033 |
| PAAD | Normal | 171 | 0     | 7.495 | 4.468 | 0.721 | 4.46  | 0.863 | 0.066 |
| PAAD | Tumor  | 179 | 4.207 | 8.311 | 7.06  | 0.532 | 7.035 | 0.546 | 0.041 |
| PCPG | Normal | 3   | 5.262 | 6.075 | 5.533 | 0.406 | 5.623 | 0.414 | 0.239 |
| PCPG | Tumor  | 182 | 4.305 | 8.082 | 6.2   | 0.799 | 6.228 | 0.663 | 0.049 |
| PRAD | Normal | 152 | 5.009 | 7.007 | 6.033 | 0.594 | 6.032 | 0.44  | 0.036 |
| PRAD | Tumor  | 496 | 4.615 | 8.716 | 6.635 | 0.538 | 6.625 | 0.477 | 0.021 |
| READ | Normal | 318 | 0     | 7.804 | 5.972 | 0.865 | 6.002 | 0.906 | 0.051 |
| READ | Tumor  | 93  | 5.589 | 8.468 | 7.087 | 0.616 | 7.15  | 0.521 | 0.054 |
| SARC | Normal | 2   | 5.944 | 6.524 | 6.234 | 0.29  | 6.234 | 0.41  | 0.29  |
| SARC | Tumor  | 262 | 5.34  | 8.768 | 7.275 | 0.734 | 7.24  | 0.576 | 0.036 |
| SKCM | Normal | 813 | 4.481 | 8.91  | 5.72  | 2.413 | 6.305 | 1.248 | 0.044 |
| SKCM | Tumor  | 469 | 5.077 | 9.235 | 7.325 | 0.773 | 7.302 | 0.611 | 0.028 |
| STAD | Normal | 210 | 0     | 7.036 | 5.377 | 0.83  | 5.303 | 0.816 | 0.056 |
| STAD | Tumor  | 414 | 3.352 | 8.53  | 6.054 | 0.886 | 6.058 | 0.712 | 0.035 |
| TGCT | Normal | 165 | 4.26  | 6.955 | 5.286 | 0.521 | 5.29  | 0.485 | 0.038 |
| TGCT | Tumor  | 154 | 4.692 | 8.854 | 7.883 | 0.788 | 7.744 | 0.714 | 0.058 |
| THCA | Normal | 338 | 0     | 7.186 | 6.086 | 0.519 | 6.085 | 0.489 | 0.027 |
| THCA | Tumor  | 512 | 5.418 | 8.744 | 7.026 | 0.603 | 6.993 | 0.478 | 0.021 |
| THYM | Normal | 446 | 1.978 | 9.138 | 6.068 | 2.067 | 6.18  | 1.388 | 0.066 |
| THYM | Tumor  | 119 | 5.577 | 8.554 | 7.714 | 0.864 | 7.578 | 0.607 | 0.056 |
| UCEC | Normal | 101 | 5.146 | 7.19  | 6.183 | 0.582 | 6.148 | 0.417 | 0.041 |
| UCEC | Tumor  | 181 | 3.752 | 8.892 | 7.083 | 0.965 | 7.016 | 0.859 | 0.064 |
| UCS  | Normal | 78  | 5.146 | 7.19  | 6.085 | 0.547 | 6.117 | 0.417 | 0.047 |
| UCS  | Tumor  | 57  | 5.36  | 8.338 | 7.153 | 0.717 | 7.021 | 0.624 | 0.083 |
| UVM  | Tumor  | 79  | 4.894 | 8.344 | 7.153 | 1.311 | 7.065 | 0.769 | 0.087 |
