# Supplementary material for: Pro-apoptotic gene BAX is a pan-cancer predictive biomarker for prognosis and immunotherapy efficacy
Source: Aging (Albany NY). 2024 Jul 5;16(14):11289–317. doi: 10.18632/aging.206003 (PMC11315380; doi:10.18632/aging.206003)
Supplement: Supplementary Table 2 [file aging-16-206003-s003.xlsx]

## Sheet: Supplementary Table 2
Supplementary Table 2. The relationship between BAX expression and pan-cancer immune checkpoint genes.
TYPE	GENE	THYM	UVM	OV	GBMLGG	LGG	MESO	ACC	PCPG	KICH	LIHC	GBM	KIRC	TGCT	UCS	ALL	LAML	CHOL	LUSC	PRAD	CESC	ESCA	READ	SKCM	WT	PAAD	UCEC	COAD	COADREAD	BRCA	LUAD	DLBC	NB	BLCA	HNSC	STAD	STES	SARC	THCA	KIPAN	KIRP	THYM	UVM	OV	GBMLGG	LGG	MESO	ACC	PCPG
Inhibitory	CD276	-0.297331	0.679154	0.682434	0.736656	0.655742	0.38957	0.474745	0.526908	0.610504	0.557307	0.505444	0.540923	0.191946	-0.00340523	-0.111568	0.247164	0.379407	0.226524	0.322962	0.206175	0.026911	0.295092	0.286568	0.448316	0.410315	0.576505	0.425044	0.39666	0.196571	0.378091	0.0834794	-0.0135892	0.396208	0.173051	0.190068	0.0840764	0.412447	0.510512	0.534932	0.3947	0.00102397	5.99139e-12	9.92611e-59	3.18042e-114	7.01481e-64	0.000191791	1.28719e-05	4.93469e-14
Inhibitory	TGFB1	0.230965	0.529511	0.630093	0.603648	0.520317	0.55032	0.322444	0.459991	0.446672	0.512631	0.547072	0.526573	0.111049	0.306409	0.233029	0.474474	0.234101	0.237408	0.159813	0.199193	-0.160761	0.0441589	0.254967	0.372508	0.392771	0.408731	0.187994	0.166085	0.339025	0.314556	-0.102773	0.132051	0.193274	0.098672	0.26023	0.0806752	0.466872	0.517379	0.252963	0.264289	0.0114976	5.23238e-07	9.64398e-48	5.79057e-67	1.18262e-36	3.35588e-08	0.00423687	1.1859e-10
Inhibitory	VTCN1	-0.256419	0.113797	0.303161	-0.106391	0.00675346	-0.144912	-0.0619551	0.131878	0.0423703	0.359221	-0.0554629	0.0443838	-0.211451	0.120889	-0.218154	0.045156	0.379423	-0.037516	0.0335851	0.0763893	-0.0682704	0.0728625	-0.254604	0.252696	-0.179727	-0.0701112	-0.0130193	0.00925174	-0.0266862	0.0102571	0.109918	-0.0980169	0.121592	0.134323	-0.064829	-0.124769	-0.199766	0.332324	0.348125	0.222522	0.0048792	0.318002	2.34671e-10	0.00614452	0.879193	0.180511	0.592459	0.0801632
Inhibitory	IL4	0.414009	-0.209916	0.0365143	0.475391	0.355311	0.179067	0.142188	-0.164717	-0.015294	0.125721	0.320985	0.020446	-0.0144429	0.241856	-0.0332521	-0.180155	-0.306181	0.0472899	-0.0226464	0.100126	0.047964	-0.108747	-0.0199468	0.0214003	0.0716977	-0.136731	-0.0981434	-0.0941352	0.0201543	0.0230103	-0.168524	-0.0408186	0.0806467	0.0293461	-0.00670329	0.0235705	0.0482832	0.100348	0.129297	0.104873	2.86306e-06	0.0633427	0.456003	1.25259e-38	1.36474e-16	0.0970128	0.217366	0.0284607
Inhibitory	ARG1	-0.182514	-0.196097	0.112674	0.0473766	-0.103358	-0.027049	-0.056961	0.0548793	-0.00566123	-0.372509	0.0887722	0.032384	0.184813	0.0718895	-0.183863	-0.214006	-0.143548	-0.0169683	-0.130804	0.0150618	-0.0190638	-0.229315	-0.0923339	-0.0414329	-0.0504556	-0.087732	-0.213265	-0.219043	-0.154643	-0.0144883	-0.249933	-0.0352491	-0.154058	-0.31349	-0.162062	-0.182873	-0.0424201	-0.0704133	0.0274416	0.137249	0.0469564	0.0832691	0.0210637	0.223471	0.0196804	0.803598	0.62268	0.468148
Inhibitory	EDNRB	-0.161622	-0.526929	0.271389	-0.176036	-0.11253	0.100051	0.378505	0.443154	0.155695	-0.0954975	0.134668	0.147453	0.0248858	-0.159805	-0.0629338	-0.13054	-0.278496	-0.0114488	-0.185543	0.115293	0.18117	0.196172	0.262557	0.110766	-0.0628603	-0.171339	0.013752	0.0325001	-0.170269	-0.00415041	-0.192453	-0.0807706	-0.028834	-0.0538538	0.0334782	0.123755	0.0151414	-0.15068	0.095222	0.296093	0.0790812	6.08023e-07	1.65291e-08	5.20488e-06	0.0110652	0.35651	0.000688125	6.53726e-10
Inhibitory	IDO1	-0.14948	0.567957	0.286433	0.556986	0.450776	0.218081	0.256588	0.229959	0.0220291	0.137387	0.348822	0.114881	0.171969	0.00854476	-0.0949667	-0.100293	0.0353001	0.0448388	0.102748	0.0140183	0.0812868	0.118161	0.037438	0.00968703	0.194289	0.163799	0.0814276	0.0881023	0.112844	0.132114	0.158685	0.367685	0.14863	0.181025	0.198205	0.171163	0.12781	0.0518975	-0.0950644	0.0684416	0.104685	4.78885e-08	2.35545e-09	3.28391e-55	7.65907e-27	0.0424386	0.0242857	0.00207624
Inhibitory	VEGFA	-0.309701	0.27955	0.55936	0.518533	0.337034	-0.0428267	0.36725	0.407947	0.0649136	0.168315	0.118834	0.22722	0.0227646	-0.0642382	-0.133568	-0.092928	0.18253	0.182075	-0.0542891	-0.042276	0.125327	0.02287	0.0882696	0.0615989	0.214061	0.10772	0.154115	0.121407	-0.00296832	0.179981	-0.086084	0.0507527	-0.0620323	-0.0178852	0.137523	0.0808396	0.0434496	-0.0504984	-0.177489	-0.0720307	0.000609277	0.012594	7.28524e-36	7.80601e-47	5.49932e-15	0.693682	0.001018	1.73989e-08
Inhibitory	IL13	-0.134819	0.130679	0.0699035	-0.0198721	0.0672174	0.182076	0.185367	0.044651	0.0622465	0.0101177	-0.0121622	0.0869049	-0.177668	0.0674342	0.0760922	0.180976	-0.0663923	0.0621973	0.0385882	0.0291059	0.0658997	0.0577892	-0.0830769	-0.0761931	-0.0153891	-0.00106688	-0.0154419	0.00220716	0.0470305	0.122885	-0.0290304	0.00380642	-0.0510601	0.0785579	0.00395404	0.0372738	-0.0163786	0.0863516	0.00181258	0.0406605	0.143779	0.251001	0.153188	0.609785	0.129904	0.0914359	0.106526	0.555105
Inhibitory	KIR2DL1	-0.224661	0.157707	0.124321	0.190139	0.141633	-0.12727	-0.0616533	-0.00647002	-0.0974288	0.00800258	0.103617	0.231259	-0.00563151	-0.270826	0.00163406	-0.0991144	0.123924	-0.0257571	0.0323833	-0.0698905	-0.0533324	-0.14419	-0.135522	0.139116	-0.0406289	0.00558989	-0.101773	-0.105168	-0.00488823	0.147562	-0.039674	0.160909	0.127979	0.0447173	0.0828214	0.100505	0.0579002	-0.12274	-0.0335591	0.0641235	0.0140344	0.16511	0.0108632	8.3109e-07	0.00135676	0.240112	0.594267	0.931889
Inhibitory	KIR2DL3	-0.105916	0.438844	0.0958457	0.222686	0.186013	-0.127741	-0.145731	0.0454664	0.0828059	0.0724496	0.14479	0.202513	-0.0439567	-0.261425	0.054651	-0.0253023	-0.0217116	-0.0566981	-0.0387989	0.000700899	-0.102864	-0.0681942	0.0357439	0.197352	-0.0036126	0.0411195	-0.0119048	-0.017467	-0.000783572	0.0765374	0.0730858	0.210612	0.0995585	0.0876598	0.160839	0.146707	0.0814909	-0.0513873	-0.0561736	0.0311931	0.251612	5.21893e-05	0.0499295	6.97102e-09	2.40809e-05	0.238362	0.206002	0.547896
Inhibitory	IL12A	-0.311051	0.0590743	0.27101	0.00139969	0.0384081	0.334591	0.372964	0.150174	0.522241	0.284992	0.216958	0.255048	-0.144589	-0.0430878	0.0620257	0.228751	-0.154279	0.0216542	0.0491623	0.190664	0.0317772	0.314132	0.105726	0.137534	0.0264463	0.00874564	0.144139	0.169276	0.0400678	0.17277	-0.0866755	-0.199437	0.165997	0.256408	0.038477	0.0333016	-0.0399845	0.116369	0.113437	0.19587	0.000574929	0.605053	1.73358e-08	0.971326	0.387195	0.00153732	0.000835899	0.0460315
Inhibitory	LAG3	-0.448747	0.674938	0.414244	0.343701	0.372591	0.339835	0.147108	-0.0106061	0.335658	0.254992	0.0834788	0.232788	-0.0393943	0.164772	0.136958	-0.0646688	0.092799	0.113745	0.00919558	0.127823	0.0552354	-0.0275274	-0.044448	0.36744	0.274913	0.322005	0.160517	0.135729	0.272246	0.260663	0.103474	0.140779	0.224362	0.298537	0.251164	0.222676	0.176863	0.143614	0.113363	0.116242	3.08021e-07	9.04355e-12	8.37114e-19	8.59999e-20	3.30082e-18	0.00128038	0.201703	0.888574
Inhibitory	HAVCR2	-0.325504	0.497227	0.512736	0.493792	0.412477	0.243168	0.185307	0.274522	0.428186	0.389569	0.323594	0.281705	0.0738704	-0.105874	-0.0622697	0.0622183	0.157118	-0.0122696	0.0140014	0.0986717	0.040548	-0.0443605	0.112521	0.110579	0.144911	0.125892	-0.0518003	-0.045688	0.0947653	0.169532	0.112836	0.1672	0.287244	0.271815	0.18312	0.19167	0.393624	0.224684	0.304702	0.135816	0.000303569	3.13852e-06	1.81294e-29	5.50485e-42	2.49926e-22	0.0232384	0.106643	0.000217567
Inhibitory	IL10	-0.144198	0.387305	0.417665	0.423054	0.280752	-0.0141083	0.13922	0.244829	0.288115	0.146502	0.21827	0.324217	0.236259	-0.0402803	-0.0504969	-0.0592227	-0.0186041	0.00104657	-0.015074	0.212617	0.0428762	0.0467939	0.234953	-0.0674587	0.219075	0.159938	-0.0808002	-0.0536407	0.092348	0.100366	0.026524	0.15825	0.236251	0.0501764	0.125899	0.131706	0.35626	0.106514	0.218943	0.228066	0.117677	0.000421468	4.05161e-19	3.98384e-30	1.12876e-10	0.896806	0.227216	0.00102243
Inhibitory	CD274	-0.234274	0.238153	0.449661	0.392679	0.264761	0.302605	0.0786085	-0.0611087	0.270587	0.141581	0.251056	0.128149	0.031596	0.125989	-0.109344	-0.244108	-0.211082	0.0562882	-0.150573	-0.022988	0.0064144	0.151204	0.174637	0.166778	0.144438	0.104576	-0.085075	-0.043125	0.00568561	0.128259	0.139656	0.0356503	0.295079	0.134221	0.151371	0.0940442	-0.0965092	0.0792513	0.0193385	0.0353172	0.0103341	0.0345557	3.02114e-22	7.82085e-26	1.30158e-09	0.00438836	0.496785	0.419094
Inhibitory	BTLA	0.0127688	0.371006	0.216512	0.234625	0.220216	0.181817	-0.0446376	0.191816	0.247844	0.203288	0.0321999	0.18065	0.306367	-0.188411	-0.00451666	-0.076922	-0.0555083	-0.0794779	0.038782	0.0272284	-0.0128854	0.0439957	0.00977739	0.0836621	0.0782127	0.00753834	-0.00146211	0.00802505	0.0300388	-0.021472	-0.083134	0.279422	0.0949839	0.146585	0.0637653	0.0860666	0.0900031	0.0866081	0.155144	0.166985	0.890378	0.000762668	7.75619e-06	9.91057e-10	5.22631e-07	0.0919063	0.699882	0.0105381
Inhibitory	SLAMF7	-0.318403	0.246238	0.362648	0.429169	0.300954	0.0465209	0.098693	0.249515	0.319754	0.350195	0.313187	0.216864	-0.0727317	-0.0663353	-0.0149044	-0.279017	0.0814463	-0.132379	0.0295579	0.0421092	-0.128787	0.0366828	-0.128653	0.111811	0.197055	0.124742	0.0190498	0.02192	0.0509277	0.0357388	0.086427	0.282806	0.147955	0.00570972	0.134713	0.116076	0.140791	0.115569	0.121963	0.178218	0.000417111	0.0287043	1.80986e-14	4.80324e-31	4.07545e-12	0.668743	0.393133	0.000810468
Inhibitory	CTLA4	-0.47128	0.397892	0.283556	0.261049	0.205362	0.245119	-0.00574194	-0.0126107	0.305649	0.359554	0.196577	0.259068	-0.0584367	-0.0834424	-0.046594	-0.0497088	-0.00370347	0.0395553	0.0518014	0.0834547	0.11849	0.0598708	0.0329618	-0.183167	0.147644	0.0732407	0.0141937	0.0217272	0.130499	0.140185	0.130186	0.206547	0.203206	0.235755	0.138861	0.136356	0.116106	0.173407	0.211596	0.137317	6.31784e-08	0.000281965	3.44986e-09	8.94284e-12	2.98746e-06	0.0221216	0.960472	0.86769
Inhibitory	TIGIT	-0.450287	0.520678	0.286477	0.0139619	-0.0206452	0.210724	-0.18056	0.145358	0.348403	0.304107	0.17255	0.22832	0.0142666	-0.00757748	0.0249923	-0.227634	0.106855	-0.0637996	0.0277515	0.0333172	0.0358991	0.0259421	0.0136479	0.178303	0.141291	0.153093	0.00152059	0.00928939	0.0770312	0.0888586	0.139032	0.193082	0.138227	0.156072	0.217488	0.208044	0.165419	0.156002	0.0661483	0.139761	2.77391e-07	8.70125e-07	2.34162e-09	0.719918	0.642159	0.0500975	0.116082	0.0535535
Inhibitory	ADORA2A	0.625704	0.443583	0.606954	0.146121	0.252166	0.287014	0.406883	0.48841	0.334191	0.300788	0.31213	0.349972	0.619103	-0.279158	-0.0626375	0.147008	-0.205691	0.119894	0.0504502	0.355774	0.117141	-0.0263444	0.00432294	0.403827	0.151054	0.337034	0.114741	0.0857405	0.167321	0.273053	0.0569756	0.238554	0.173296	0.225231	0.28844	0.290688	0.136191	0.0714613	0.0193678	0.145709	2.78018e-14	4.23246e-05	1.58439e-43	0.000161443	7.99237e-09	0.00703201	0.00024045	5.3385e-12
Inhibitory	PDCD1	0.549548	0.576482	0.31509	0.442418	0.371309	0.204175	-0.0580012	0.170971	0.391005	0.331758	0.268546	0.27866	-0.0137227	-0.152371	-0.204157	0.154125	0.0982513	0.0466232	0.0887677	0.112705	0.0394861	0.0862811	-0.00794252	0.250751	0.112734	0.240108	0.154607	0.146793	0.22213	0.214194	0.142897	0.238733	0.190527	0.199498	0.260894	0.237984	0.141547	0.156206	0.240667	0.110861	9.64453e-11	2.70177e-08	4.13091e-11	4.222e-33	4.38496e-18	0.0578399	0.616331	0.0228888
Inhibitory	VEGFB	0.0346486	0.0545158	0.684938	0.324631	0.317565	-0.109373	0.390732	0.0433029	0.0678235	0.380136	0.332603	0.195034	-0.195241	0.127162	0.280575	0.264115	0.00846914	0.194975	0.37073	0.200895	0.0766405	-0.0907786	0.413529	0.213842	0.29688	0.412738	0.358267	0.272188	0.234953	0.26324	0.0428386	0.270022	0.341405	0.311572	0.0676588	0.0707991	-0.13677	-0.0603701	0.0749403	0.296977	0.708334	0.633235	2.58948e-59	1.03539e-17	2.17208e-13	0.313244	0.000442493	0.567122
Inhibitory	C10orf54	-0.302697	0.654782	0.535223	0.0136602	0.0995808	-0.335748	0.224094	0.572523	0.417118	0.269941	0.2286	0.510994	0.0203134	-0.21221	0.363082	0.44267	-0.0997177	-0.0126256	0.0201563	0.100169	0.0480946	0.0844791	0.0697795	0.238062	0.314931	0.311494	0.214197	0.19541	0.170632	0.25332	0.175646	0.144289	0.157872	-0.137464	0.167776	0.160066	0.17553	0.204324	0.348767	0.320852	0.000819745	5.91888e-11	1.98487e-32	0.725723	0.0246587	0.00147695	0.0500838	8.39926e-17
Stimulaotry	IL1A	-0.275029	0.193603	0.266221	0.242215	0.102421	-0.0257481	0.169673	-0.0329023	0.0625215	0.238712	0.111578	0.0758389	0.177273	-0.0388714	-0.0619255	-0.163972	0.398504	-0.0266128	-0.0135279	-0.0495758	-0.0873323	0.278427	0.19851	0.0457417	0.0844497	0.0498119	0.0132282	0.0649456	-0.0556384	0.0782242	-0.0113134	-0.0123818	-0.0141792	-0.170304	0.0221168	-0.133549	-0.037518	0.288421	0.100777	-0.0313415	0.0024687	0.087345	3.14284e-08	2.71004e-10	0.0208258	0.812868	0.140148	0.663742
Stimulaotry	IL1B	-0.394174	0.355677	0.4218	0.167283	0.033195	-0.0881194	0.138704	0.0156395	0.193598	0.332189	0.224256	0.252652	0.0201504	0.177226	0.127424	-0.123921	0.156534	0.0150109	0.00888392	0.0367711	0.200006	0.271506	0.238867	0.0211761	-0.0125358	0.120499	-0.0387128	0.022919	0.0139437	0.141226	0.0130606	0.0573437	0.0898516	-0.134566	-0.0371227	0.00303538	0.196305	0.179637	0.143076	0.0843524	9.18595e-06	0.0012962	1.6672e-19	1.51525e-05	0.454896	0.417012	0.228961	0.836315
Stimulaotry	TNF	-0.440476	0.493873	0.314477	0.0149801	0.0434963	0.00721524	0.192943	0.010032	0.222007	0.292598	0.0972306	0.285306	0.0185831	0.221382	-0.0774544	0.0598639	0.391166	0.0570181	0.00262089	0.116877	0.00886807	0.262813	0.14956	0.0232467	0.162234	0.0684215	0.0798732	0.118566	0.148558	0.153374	0.193295	0.241039	0.181419	0.0331904	0.160729	0.0745368	0.16301	0.192033	0.312456	0.111922	5.35729e-07	3.74187e-06	4.52489e-11	0.700443	0.327396	0.947118	0.0927212	0.894569
Stimulaotry	SELP	-0.228303	0.207139	0.333868	0.0628263	-0.00681034	-0.206082	0.0135422	0.332002	0.198553	-0.0223512	0.140764	0.202634	-0.216077	0.0119847	0.157351	-0.281523	-0.114637	-0.0372036	0.0163335	0.177355	-0.00545689	0.031974	0.0614085	0.0516904	0.00352311	0.0215851	0.031218	0.0240812	0.0153097	0.0518804	0.0204414	-0.0358181	-0.0209241	-0.0565904	-0.0334599	0.00862407	-0.0766367	0.263859	0.0397943	0.0937355	0.0125149	0.0670005	2.28289e-12	0.106306	0.878184	0.0554913	0.906944	6.34919e-06
Stimulaotry	IFNA1	-0.292477	-0.0582416	0.0349802	-0.0297386	0.000601373	0.0725264	0.130405	-0.0172063	0.070989	0.0823174	-0.0250261	-0.0344713	0.0604854	0.021385	-0.0713362	-0.0374573	-0.0126384	0.122282	-0.0651335	-0.0804097	-0.0995528	-0.028844	-0.078164	0.019363	0.124317	-0.0723632	-0.0992058	-0.0826966	-0.0393798	0.128817	0.109672	0.0795364	0.00818003	0.00649613	-0.0629763	-0.126266	0.0233952	0.147437	0.149909	0.0449039	0.00124765	0.61016	0.475161	0.44494	0.989202	0.504404	0.258299	0.820183
Stimulaotry	IL2	-0.196887	0.181589	0.0223661	0.155266	0.177711	0.102702	-0.0505012	0.0175186	0.108079	0.203361	-0.0629392	0.0586965	0.00372414	-0.189637	-0.18073	-0.165528	-0.145833	-0.0778349	-0.00331202	0.0225326	-0.0783557	0.0215918	-0.109523	-0.233403	0.0376619	-0.0713149	-0.0481822	-0.038946	0.0183049	-0.0218253	0.0743879	0.0909952	-0.0033627	0.122792	-0.00338873	0.0304059	0.0335502	0.0294844	0.0610727	0.0754514	0.0318595	0.109239	0.648021	6.02827e-05	5.53957e-05	0.343849	0.662709	0.816976
Stimulaotry	IFNA2	-0.144101	-0.0841928	-0.0091161	-0.182959	-0.127413	0.159674	0.188221	-0.0632038	0.0633399	-0.0290976	-0.0310096	-0.0514844	0.00157316	-0.0951904	0.0426653	-0.0816969	NA	0.0449548	-0.120973	0.0212556	-0.0201552	-0.0101761	0.0597672	0.210847	0.0500166	-0.204938	-0.379095	-0.310688	-0.0316898	-0.000181482	0.095287	-0.0421057	0.0218773	0.00129274	0.0372662	0.019772	-0.074459	-0.0650434	-0.056443	-0.0285706	0.117926	0.460693	0.852407	2.15217e-06	0.00398616	0.139597	0.10115	0.403296
Stimulaotry	TLR4	-0.353575	-0.0707203	0.503984	-0.181609	-0.158029	0.13082	0.153316	0.329099	0.454474	-0.0122516	-0.0212044	0.22483	-0.0199955	-0.0965551	-0.0595444	0.205952	-0.0830094	0.00801143	-0.111482	0.19253	-0.0196399	-0.00329022	0.0610577	0.16945	0.12052	0.021377	-0.0777015	-0.0706645	-0.133779	0.0658007	0.0105158	0.093709	0.0829958	0.0985736	0.0336881	0.0816539	0.217425	0.0173816	0.000498915	0.188156	7.99572e-05	0.535697	2.25011e-28	2.56348e-06	0.000344847	0.22714	0.183115	7.72824e-06
Stimulaotry	ENTPD1	-0.404626	-0.386145	0.645972	0.509004	0.37473	0.302983	0.374993	0.597833	0.451664	0.349469	0.414039	0.374484	-0.293881	-0.0835743	0.177683	-0.0446839	0.0417911	-0.0583059	-0.0485671	0.197755	0.0703968	0.0128784	-0.0994877	0.298329	0.195823	0.0723899	-0.0153489	-0.0158463	-0.0608428	0.0866394	-0.0538266	-0.0523973	0.163531	0.10539	0.000926412	0.0490659	-0.232173	0.198787	0.0924278	0.175473	5.01612e-06	0.000440084	7.55642e-51	6.41085e-45	2.04944e-18	0.00433714	0.000778731	1.56117e-18
Stimulaotry	CD40	-0.325276	-0.0880328	0.512264	0.524082	0.367691	-0.103056	0.112607	0.155035	0.176453	-0.0827469	0.37412	0.439748	-0.0425559	-0.0424761	0.272511	0.0538061	0.0315172	0.120738	-0.0486535	0.150595	-0.105711	0.0995179	0.116483	0.118276	0.14116	0.134455	0.0874307	0.086592	0.153536	0.192372	0.10933	0.203535	0.000612861	0.274608	0.259264	0.191979	0.241185	0.306577	0.214598	0.196903	0.000306721	0.440422	2.08058e-29	5.61319e-48	9.70405e-18	0.342175	0.329525	0.0393534
Stimulaotry	BTN3A1	-0.269029	0.286659	0.549189	0.337261	0.276648	-0.144836	0.392285	0.246496	0.374465	0.0117437	0.212608	0.291825	-0.363236	-0.00447703	0.222658	-0.118737	-0.0523277	0.0179036	-0.0465076	0.0576553	0.0949522	-0.0605278	0.106813	0.338804	0.224951	0.0553175	0.0240324	0.0158574	0.0257607	0.0891701	-0.128013	0.0973632	0.139341	0.118047	0.081264	0.0922622	0.0487677	0.0733582	0.170429	0.160972	0.00309109	0.0104292	2.2091e-34	4.50182e-19	2.14644e-10	0.180743	0.00041785	0.000941791
Stimulaotry	BTN3A2	-0.11318	0.379885	0.513638	0.398452	0.368499	-0.0604079	0.253785	0.239451	0.206911	0.0393795	0.127716	0.258265	-0.290604	0.0114574	0.383147	-0.0917048	-0.119394	0.0530743	-0.0410696	0.0658483	-0.0197929	-0.12112	0.336836	0.300471	0.196619	0.0123142	0.16685	0.124554	0.0701428	0.105076	0.0945468	0.122145	0.105987	0.07631	0.127081	0.0960935	0.0830029	0.0385773	0.197926	0.238436	0.220365	0.000554218	1.39232e-29	1.29149e-26	8.13395e-18	0.578343	0.0259385	0.00132763
Stimulaotry	IFNG	-0.324712	0.444629	0.166725	0.242066	0.253324	0.297117	0.058328	0.0700161	0.216453	0.231198	-0.0271952	0.19243	0.0468656	-0.0881943	-0.112199	-0.236474	0.0922564	0.0200211	-0.0413073	0.0309359	0.0399028	0.119953	0.0352965	-0.0787637	0.118817	0.184895	-0.0481755	-0.0252223	0.052465	0.0276227	0.197074	0.13117	0.179814	0.18006	0.115893	0.12518	0.0808069	0.0557892	0.0492391	0.136621	0.000314639	4.03949e-05	0.000611216	2.78104e-10	6.79176e-09	0.00519566	0.614343	0.354425
Stimulaotry	GZMA	-0.402904	0.521605	0.295747	0.437289	0.333928	0.157124	-0.0983504	0.156473	0.159826	0.231068	0.178069	0.212299	-0.0567201	0.0160081	0.0735521	-0.191735	0.00805633	-0.0338173	0.0506917	-0.00304325	-0.0115506	-0.0432854	-0.0165341	0.0849291	0.131431	0.209347	0.0793542	0.0645666	0.09544	0.0621631	0.202845	0.238869	0.18481	0.185166	0.119252	0.145854	0.156424	0.0439184	0.0532585	0.141414	5.5497e-06	8.25451e-07	6.64337e-10	2.70576e-32	1.00631e-14	0.146112	0.394786	0.0375418
Stimulaotry	CXCL9	-0.379252	0.512345	0.306103	0.500457	0.409014	0.301095	0.0874676	0.23051	0.367649	0.174759	0.163821	0.230823	-0.0420358	-0.0796863	-0.0120357	-0.246825	-0.150407	-0.00878647	-0.0120406	0.0634284	-0.0662456	0.0100223	-0.00184595	0.0291016	0.0985283	0.122905	-0.0273688	-0.0173774	0.0194699	0.102121	0.0429463	0.252991	0.168326	0.122838	0.195095	0.162066	0.101477	0.0356009	-0.0203508	0.0468919	2.10447e-05	1.38778e-06	1.54008e-10	2.97517e-43	6.00052e-22	0.00459863	0.449396	0.00202399
Stimulaotry	TNFRSF9	-0.347361	0.580616	0.373132	0.350778	0.226791	0.137114	0.275714	0.203055	0.334834	0.314335	0.206162	0.220296	0.17719	0.207007	-0.0327171	-0.156686	-0.11139	0.0111463	0.00314108	0.119918	0.0533042	0.0946781	0.0981455	-0.0664496	0.201477	-0.029646	-0.00760526	0.0165811	0.0353374	0.0732261	0.150439	0.147126	0.231811	0.164261	0.199592	0.18591	0.231907	0.127935	0.167674	0.111906	0.000108612	2.03491e-08	2.7403e-15	1.33321e-20	2.32106e-07	0.205367	0.0152222	0.00671549
Stimulaotry	CD80	-0.336809	0.312936	0.36546	0.491925	0.372316	0.385697	0.264465	0.140302	0.368231	0.312884	0.319832	0.28998	0.156679	-0.055988	-0.261864	0.025128	0.0489609	0.0533595	0.0655457	0.120054	0.0868252	0.0693351	0.169512	-0.093681	0.201936	0.133252	-0.11979	-0.0746592	0.0611846	0.145125	0.162327	0.215443	0.265512	0.212749	0.13573	0.134863	0.21809	0.234939	0.106669	0.139675	0.000180092	0.00498511	1.09823e-14	1.23254e-41	3.50868e-18	0.000224836	0.0201113	0.0625196
Stimulaotry	CXCL10	-0.418934	0.518173	0.350985	0.579641	0.439075	0.311201	0.121361	0.137994	0.303055	0.098927	0.282712	0.143689	0.26867	0.0563115	0.00513547	0.00720844	-0.0784304	0.0302138	0.111414	0.0931009	-0.028396	0.0480763	0.0503049	-0.146253	0.180174	0.129402	0.0140137	0.0235518	0.105805	0.0921044	0.0609844	0.205417	0.215024	0.150537	0.200305	0.151122	0.142381	0.124102	-0.105997	0.0310086	2.11841e-06	1.00252e-06	1.36448e-13	1.11294e-60	2.11206e-25	0.00334698	0.293071	0.0670034
Stimulaotry	IL2RA	-0.338446	0.380867	0.429488	0.444374	0.272074	0.371679	0.177434	0.47878	0.430964	0.406924	0.123643	0.289667	0.0555941	0.183326	0.138887	0.108569	-0.0700173	0.0130245	-0.00580366	0.127353	0.103156	0.0806202	0.0258576	0.201241	0.123478	0.129761	-0.014605	0.000962908	0.0902798	0.150406	-0.317489	0.290189	0.266387	0.205903	0.190549	0.191094	0.382791	0.230523	0.190429	0.210963	0.000166699	0.000534693	3.09412e-20	2.06163e-33	4.3393e-10	0.000393322	0.12264	1.57635e-11
Stimulaotry	CD27	0.202801	0.531429	0.361468	0.371944	0.375254	0.199659	-0.124962	0.168362	0.466126	0.348282	0.252217	0.268466	-0.140489	-0.0696432	0.270007	-0.0914409	0.0827085	-0.104932	0.0710421	0.0970491	0.00708619	0.0039009	-0.01304	0.0184453	0.142393	0.219001	0.166143	0.137504	0.156469	0.0775338	0.0657381	0.267375	0.143331	0.172475	0.148366	0.170246	0.124172	0.140689	0.190114	0.0943179	0.0269677	4.67637e-07	2.22864e-14	3.7846e-23	1.82278e-18	0.0637289	0.278875	0.0250871
Stimulaotry	CCL5	-0.341164	0.591828	0.371051	0.514134	0.415538	0.269127	-0.0344471	0.137057	0.245796	0.260175	0.256422	0.256916	-0.0725809	0.136695	0.1367	0.139536	0.109013	0.0236479	0.0128444	0.0459018	-0.0449803	-0.0774852	0.0456765	0.196938	0.123938	0.200172	0.139678	0.110698	0.168707	0.0982955	0.174215	0.24542	0.170096	0.165905	0.269651	0.243223	0.118803	0.0666532	0.120492	0.0904396	0.000146492	9.24469e-09	4.00797e-15	6.07843e-46	1.14265e-22	0.0117144	0.766149	0.0688955
Stimulaotry	PRF1	0.0355994	0.598162	0.35034	0.530314	0.358271	0.146982	0.108696	0.334338	0.375596	0.14975	0.409941	0.377351	0.250051	0.0211925	0.221007	-0.0605003	-0.0601541	0.0471089	0.0268772	0.0697227	-0.0135762	-0.0549363	0.113394	0.304966	0.103841	0.302269	0.0670321	0.0449214	0.172616	0.143874	0.184322	0.351485	0.223287	0.191719	0.26377	0.228276	0.202424	0.0321841	0.0950296	0.161575	0.700707	5.84038e-09	1.5222e-13	2.75403e-49	7.3305e-17	0.174298	0.346706	5.41219e-06
Stimulaotry	TNFSF4	0.172442	0.315573	0.416615	0.226641	0.0583142	0.380842	0.252048	-0.0758628	0.575142	0.222926	0.150998	0.339618	0.0682803	-0.462995	0.323022	-0.00371978	-0.381857	0.00218939	-0.00892082	0.164006	0.0031971	0.0047853	0.22589	-0.0343289	0.148487	-0.00134321	-0.0482016	-0.037021	-0.00195923	0.0730246	0.0492757	-0.0649618	0.242653	0.193488	0.117702	0.129471	0.120535	0.310563	0.157465	0.180064	0.0607469	0.00461223	5.06732e-19	3.69713e-09	0.18901	0.000273672	0.0270101	0.315578
Stimulaotry	CD40LG	0.145386	0.383528	0.210535	0.364602	0.302878	-0.0309821	0.0917237	0.10923	0.312125	0.238461	0.218533	0.272773	-0.188312	-0.24004	-0.264649	-0.263191	-0.0235027	-0.0354746	-0.0626241	0.0556761	0.122698	0.206393	0.0645735	0.113682	0.086875	-0.0172881	0.0906265	0.106172	0.016717	0.0127961	-0.211051	0.229428	-0.00382849	0.0601111	0.0204053	0.138178	-0.0549602	0.0902501	0.270329	0.129081	0.11465	0.000484898	1.38976e-05	3.04137e-22	2.92904e-12	0.775743	0.427556	0.147828
Stimulaotry	CD28	0.403622	0.48494	0.455381	0.373833	0.243631	0.100009	0.106811	0.409239	0.454617	0.173369	0.127397	0.283242	-0.0361194	-0.0210987	-0.162353	-0.222076	-0.00467853	-0.0401769	-0.0415017	0.128341	0.0809611	0.0597414	-0.0338588	0.0313155	0.0877187	-0.0431253	-0.0386636	-0.0200369	-0.0024956	0.0299923	0.0817458	0.162729	0.143639	0.0876009	0.0704083	0.141366	0.281753	0.166039	0.23447	0.161249	5.32123e-06	5.92317e-06	7.67991e-23	2.19423e-23	2.5894e-08	0.356713	0.355186	1.55266e-08
Stimulaotry	ICOS	0.476603	0.41378	0.268156	0.439221	0.357625	0.180091	-0.0627975	0.12253	0.338415	0.313905	0.222901	0.241951	0.146697	0.0899499	-0.187788	-0.207934	0.229608	0.00356135	0.0148554	0.126439	0.0963878	0.10927	0.118703	-0.096543	0.116951	0.0405929	-0.0563786	-0.0258133	0.0736407	0.0787189	0.0732709	0.247039	0.142207	0.156682	0.0726569	0.0758778	0.12217	0.15395	0.121136	0.0899664	4.27253e-08	0.00015034	2.47474e-08	1.34905e-32	8.39951e-17	0.0950856	0.587427	0.10422
Stimulaotry	CX3CL1	-0.262462	0.42754	0.493142	-0.272516	-0.193213	0.236487	0.213261	0.501058	0.0869911	0.355584	0.222941	0.36615	0.00566157	0.075071	-0.119327	-0.0678354	0.359702	0.109783	-0.0381204	0.260685	-0.0817595	0.0616516	0.335412	0.389943	0.218344	0.364193	0.28726	0.255039	0.117808	0.155466	0.0931464	-0.0757703	0.184121	0.236463	0.308935	0.156655	-0.252867	0.341993	0.356759	0.34401	0.00393117	8.49716e-05	4.61734e-27	9.7584e-13	1.13451e-05	0.0274344	0.0625695	1.22186e-12
Stimulaotry	TNFSF9	-0.356562	0.803444	0.379708	-0.186997	-0.245154	0.375846	0.239108	0.158837	0.391419	0.282435	0.118461	0.404896	0.494191	0.387048	0.0054092	0.437743	0.170682	0.0686226	-0.0306435	-0.111945	-0.0432211	0.31359	0.272711	0.0660896	0.379109	0.311932	0.219532	0.242657	0.219994	0.180827	0.300164	-0.0366102	0.220844	-0.0379829	0.170531	0.0952525	0.403468	0.469059	0.538766	0.364905	6.88537e-05	5.11148e-19	8.09421e-16	1.26591e-06	2.10613e-08	0.000333957	0.0362305	0.0347176
Stimulaotry	HMGB1	0.597914	0.204956	0.742991	0.114875	0.199672	-0.00568753	0.605221	0.453541	0.646001	0.304413	0.274373	0.392248	0.334546	0.152084	0.134917	-0.0644679	0.0615712	0.169712	0.116872	0.14621	0.156945	0.238514	0.146685	0.281426	0.562184	0.43122	0.326183	0.281157	0.0719586	0.300222	-0.0681587	0.33707	0.359595	0.22692	0.197846	0.203948	0.0767981	0.285387	0.329097	0.293424	6.99035e-13	0.0699949	1.0092e-74	0.00307762	5.63794e-06	0.958303	5.52829e-09	2.30585e-10
Stimulaotry	ITGB2	0.453409	0.439587	0.520143	0.543269	0.485104	0.24162	0.116668	0.318671	0.511894	0.413267	0.358746	0.482104	-0.0105168	-0.0354744	0.238386	0.331789	0.137596	0.0680934	0.109334	0.0813671	-0.0426933	-0.0606628	0.116231	0.220429	0.146267	0.233898	0.0519673	0.0337305	0.274949	0.213106	0.318502	0.260912	0.270062	0.200854	0.247059	0.2292	0.355337	0.280309	0.430073	0.293168	2.24e-07	5.05145e-05	2.02968e-30	4.25725e-52	2.09824e-31	0.0241585	0.312269	1.5403e-05
Stimulaotry	TNFRSF14	-0.04637	0.499641	0.526158	0.591987	0.479473	0.269157	-0.0610692	0.0091496	0.139461	0.187081	0.356103	0.288263	-0.292635	0.00711728	0.22171	0.175223	0.161566	0.144785	0.258102	0.0892326	0.0962701	-0.0427391	0.24341	0.300914	0.451605	0.246821	0.468627	0.402652	0.332541	0.365508	0.382084	0.174133	0.066554	0.364712	0.212361	0.244084	0.0379961	0.126599	0.264716	0.11401	0.616535	2.76221e-06	3.29523e-31	7.60027e-64	1.27705e-30	0.0117048	0.597772	0.903796
Stimulaotry	TNFRSF4	-0.29224	0.552115	0.49519	0.576028	0.451265	0.448558	0.209888	0.371068	0.185495	0.376981	0.373182	0.343206	-0.0672705	-0.0312807	0.225646	0.161929	-0.0171847	0.123771	0.157071	0.245592	0.132879	-0.111698	0.12911	0.504439	0.280899	0.325812	0.290361	0.219277	0.44021	0.37819	0.351919	0.314725	0.209595	0.245339	0.418159	0.394446	0.364157	0.211963	-0.0226425	0.0587346	0.00125964	1.33041e-07	2.63072e-27	8.86123e-60	6.64872e-27	1.31727e-05	0.0669365	3.68644e-07
Stimulaotry	CD70	-0.375488	0.667672	0.250758	0.482555	0.313369	0.403583	0.0560128	0.101405	0.267798	0.325835	0.202529	0.30598	0.419557	0.435819	0.30286	0.301025	0.0131821	0.0343184	0.112317	-0.0320637	-0.0648079	0.109646	0.298823	0.150382	0.27837	0.306293	0.216048	0.199541	0.207816	0.173037	0.152326	0.249306	0.19966	0.192852	0.224975	0.146753	0.249259	0.355587	0.308401	0.251395	2.57767e-05	1.81023e-11	1.98351e-07	6.53141e-40	4.63554e-13	0.000106118	0.628492	0.179267
Stimulaotry	TNFRSF18	-0.372436	0.431426	0.223962	0.272844	0.0855776	0.322979	-0.0277826	0.11745	0.194396	0.401568	0.30272	0.343151	0.00184434	0.207862	0.184715	0.131204	-0.114804	-0.0138874	0.268028	0.0292408	-0.115407	-0.0612876	0.102522	0.326856	0.318983	0.337481	0.268865	0.215797	0.221238	0.245014	0.259399	0.25166	0.184781	0.185386	0.223093	0.0172755	0.153965	0.319573	0.299558	0.174483	3.03277e-05	7.20039e-05	3.66335e-06	9.14553e-13	0.0536672	0.00227935	0.810447	0.119495
Stimulaotry	ICAM1	-0.284038	0.641941	0.493338	0.519447	0.411636	0.185082	0.433301	0.30223	0.448668	0.252095	0.261575	0.450348	0.072432	-0.0644988	-0.0640499	0.0199228	0.236188	0.114228	0.136317	0.0993172	0.107837	0.144195	0.418508	0.0923298	0.198228	0.200285	0.0630013	0.0810713	0.151656	0.0968381	0.193088	0.138761	0.319321	0.266493	0.304648	0.248408	0.248546	0.383091	0.341397	0.252695	0.00174496	1.823e-10	4.37572e-27	5.0754e-47	3.0949e-22	0.0861213	8.2761e-05	4.34285e-05
Stimulaotry	ICOSLG	-0.496439	0.594836	0.475972	0.280936	0.252618	-0.081119	0.253712	0.344146	0.131748	0.162523	0.323673	0.331323	0.535161	-0.265765	-0.0525866	-0.00122719	0.280445	0.15827	0.116046	0.189627	0.137555	-0.0074668	0.0791698	0.153842	0.327133	0.200301	0.252909	0.211086	0.195272	0.313093	0.0621473	0.112697	0.147822	0.152741	0.0691618	0.113593	0.422373	0.31126	0.206894	0.093432	9.36529e-09	7.44233e-09	4.45381e-25	1.79232e-13	7.50047e-09	0.455114	0.0259831	2.72939e-06
[truncated: 32 more columns]
