# Supplementary material for: Pro-apoptotic gene BAX is a pan-cancer predictive biomarker for prognosis and immunotherapy efficacy
Source: Aging (Albany NY). 2024 Jul 5;16(14):11289–317. doi: 10.18632/aging.206003 (PMC11315380; doi:10.18632/aging.206003)
Supplement: Supplementary Table 3 [file aging-16-206003-s004.xlsx]

## Sheet: Supplementary Table 3
Supplementary Table 3. BAX co-expression genes in pan-cancer analyzed by the GEPIA database.
cancer	infiltrates	rho	p	adj.p
ACC (n=79)	BBC3	0.529211	5.32476e-07	7.09968e-07
ACC (n=79)	LIG1	0.514167	1.25442e-06	1.63977e-06
ACC (n=79)	PIH1D1	0.591845	9.23308e-09	1.3285e-08
ACC (n=79)	PRMT1	0.487829	5.11281e-06	6.47192e-06
ACC (n=79)	PRPF31	0.476071	9.22835e-06	1.13231e-05
BLCA (n=408)	BBC3	0.359455	6.87837e-14	1.33561e-13
BLCA (n=408)	LIG1	0.401818	2.90776e-17	7.00666e-17
BLCA (n=408)	PIH1D1	0.517083	2.83152e-29	1.2049e-28
BLCA (n=408)	PRMT1	0.331166	6.7277e-12	1.14029e-11
BLCA (n=408)	PRPF31	0.559637	5.30426e-35	2.94681e-34
BRCA (n=1100)	BBC3	0.561929	1.4415e-92	1.4415e-90
BRCA (n=1100)	LIG1	0.416008	2.838e-47	3.5475e-46
BRCA (n=1100)	PIH1D1	0.491092	7.72743e-68	2.20784e-66
BRCA (n=1100)	PRMT1	0.544019	9.48895e-86	4.74447e-84
BRCA (n=1100)	PRPF31	0.643622	1.11294e-129	2.22588e-127
BRCA-Basal (n=191)	BBC3	0.62076	9.82817e-22	2.7685e-21
BRCA-Basal (n=191)	LIG1	0.490259	6.07524e-13	1.10459e-12
BRCA-Basal (n=191)	PIH1D1	0.545746	3.23013e-16	7.3412e-16
BRCA-Basal (n=191)	PRMT1	0.536739	1.20831e-15	2.68514e-15
BRCA-Basal (n=191)	PRPF31	0.682037	1.749e-27	6.996e-27
BRCA-Her2 (n=82)	BBC3	0.650744	3.64448e-11	6.07414e-11
BRCA-Her2 (n=82)	LIG1	0.41052	0.000127802	0.00014695
BRCA-Her2 (n=82)	PIH1D1	0.573448	1.7918e-08	2.54156e-08
BRCA-Her2 (n=82)	PRMT1	0.468639	8.97923e-06	1.10855e-05
BRCA-Her2 (n=82)	PRPF31	0.558081	5.11254e-08	7.10075e-08
BRCA-LumA (n=568)	BBC3	0.70848	1.009e-87	6.72666e-86
BRCA-LumA (n=568)	LIG1	0.430885	4.41986e-27	1.73328e-26
BRCA-LumA (n=568)	PIH1D1	0.550872	2.16903e-46	2.41003e-45
BRCA-LumA (n=568)	PRMT1	0.540834	1.83174e-44	1.74451e-43
BRCA-LumA (n=568)	PRPF31	0.651412	6.88653e-70	2.29551e-68
BRCA-LumB (n=219)	BBC3	0.633344	5.88388e-26	1.99454e-25
BRCA-LumB (n=219)	LIG1	0.40203	6.48785e-10	9.9813e-10
BRCA-LumB (n=219)	PIH1D1	0.486362	2.09842e-14	4.3717e-14
BRCA-LumB (n=219)	PRMT1	0.491579	1.00344e-14	2.11251e-14
BRCA-LumB (n=219)	PRPF31	0.618416	1.68886e-24	5.36148e-24
CESC (n=306)	BBC3	0.39685	5.51665e-13	1.01223e-12
CESC (n=306)	LIG1	0.380136	5.87984e-12	1.0051e-11
CESC (n=306)	PIH1D1	0.55569	3.40999e-26	1.21785e-25
CESC (n=306)	PRMT1	0.526424	3.25843e-23	9.44473e-23
CESC (n=306)	PRPF31	0.552812	6.90165e-26	2.30055e-25
CHOL (n=36)	BBC3	0.482625	0.00287171	0.00312143
CHOL (n=36)	LIG1	0.493951	0.00220065	0.00241829
CHOL (n=36)	PIH1D1	0.326641	0.051849	0.0540093
CHOL (n=36)	PRMT1	0.454826	0.00532034	0.00575172
CHOL (n=36)	PRPF31	0.536422	0.000745024	0.000837106
COAD (n=458)	BBC3	0.469747	1.62359e-26	5.90398e-26
COAD (n=458)	LIG1	0.342456	4.7729e-14	9.5458e-14
COAD (n=458)	PIH1D1	0.342228	4.97275e-14	9.84702e-14
COAD (n=458)	PRMT1	0.2776	1.50472e-09	2.24585e-09
COAD (n=458)	PRPF31	0.337851	1.0846e-13	2.06591e-13
DLBC (n=48)	BBC3	0.474056	0.000664835	0.000751226
DLBC (n=48)	LIG1	-0.0834781	0.57269	0.575568
DLBC (n=48)	PIH1D1	0.455167	0.00115189	0.00128703
DLBC (n=48)	PRMT1	0.104863	0.478124	0.482954
DLBC (n=48)	PRPF31	0.26053	0.0737033	0.0759828
ESCA (n=185)	BBC3	0.342479	1.8263e-06	2.37182e-06
ESCA (n=185)	LIG1	0.431504	8.66972e-10	1.3166e-09
ESCA (n=185)	PIH1D1	0.502271	3.23465e-13	6.10311e-13
ESCA (n=185)	PRMT1	0.534117	4.89949e-15	1.06511e-14
ESCA (n=185)	PRPF31	0.413532	4.89995e-09	7.10138e-09
GBM (n=153)	BBC3	0.61046	5.40534e-17	1.28699e-16
GBM (n=153)	LIG1	0.393159	4.97775e-07	6.72668e-07
GBM (n=153)	PIH1D1	0.433658	2.14873e-08	3.02639e-08
GBM (n=153)	PRMT1	0.523468	3.85033e-12	6.63851e-12
GBM (n=153)	PRPF31	0.532253	1.43543e-12	2.58636e-12
HNSC (n=522)	BBC3	0.541935	3.51581e-41	2.60431e-40
HNSC (n=522)	LIG1	0.561099	1.25954e-44	1.25954e-43
HNSC (n=522)	PIH1D1	0.656308	1.27739e-65	3.19347e-64
HNSC (n=522)	PRMT1	0.55636	9.39994e-44	8.5454e-43
HNSC (n=522)	PRPF31	0.687048	3.82923e-74	1.53169e-72
HNSC-HPV- (n=422)	BBC3	0.489147	9.0451e-27	3.47889e-26
HNSC-HPV- (n=422)	LIG1	0.520455	1.14702e-30	5.09788e-30
HNSC-HPV- (n=422)	PIH1D1	0.603476	3.21592e-43	2.67993e-42
HNSC-HPV- (n=422)	PRMT1	0.560329	2.96278e-36	1.74281e-35
HNSC-HPV- (n=422)	PRPF31	0.658023	1.05658e-53	1.76097e-52
HNSC-HPV+ (n=98)	BBC3	0.651678	3.67572e-13	6.8705e-13
HNSC-HPV+ (n=98)	LIG1	0.481718	5.11898e-07	6.87111e-07
HNSC-HPV+ (n=98)	PIH1D1	0.703588	6.52332e-16	1.46592e-15
HNSC-HPV+ (n=98)	PRMT1	0.416292	2.01339e-05	2.41125e-05
HNSC-HPV+ (n=98)	PRPF31	0.7207	5.93187e-17	1.39573e-16
KICH (n=66)	BBC3	0.481098	4.33175e-05	5.12633e-05
KICH (n=66)	LIG1	0.521386	7.16189e-06	9.00867e-06
KICH (n=66)	PIH1D1	0.266381	0.0306203	0.0322319
KICH (n=66)	PRMT1	0.420645	0.000436931	0.000496513
KICH (n=66)	PRPF31	0.322033	0.0083675	0.00894919
KIRC (n=533)	BBC3	0.517002	9.17919e-38	5.92206e-37
KIRC (n=533)	LIG1	0.47001	1.20462e-30	5.23748e-30
KIRC (n=533)	PIH1D1	0.435659	4.24661e-26	1.49004e-25
KIRC (n=533)	PRMT1	0.393734	3.2848e-21	8.87783e-21
KIRC (n=533)	PRPF31	0.471799	6.75475e-31	3.21655e-30
KIRP (n=290)	BBC3	0.64923	4.25806e-36	2.43318e-35
KIRP (n=290)	LIG1	0.346798	1.2818e-09	1.92752e-09
KIRP (n=290)	PIH1D1	0.455082	3.13107e-16	7.19786e-16
KIRP (n=290)	PRMT1	0.350122	8.68953e-10	1.3166e-09
KIRP (n=290)	PRPF31	0.558244	3.69442e-25	1.19175e-24
LGG (n=516)	BBC3	0.303369	1.90699e-12	3.37521e-12
LGG (n=516)	LIG1	0.529491	1.25553e-38	8.37022e-38
LGG (n=516)	PIH1D1	0.492654	6.63422e-33	3.40217e-32
LGG (n=516)	PRMT1	0.558239	1.31106e-43	1.14005e-42
LGG (n=516)	PRPF31	0.630571	1.48624e-58	2.70225e-57
LIHC (n=371)	BBC3	0.574896	5.08721e-34	2.74984e-33
LIHC (n=371)	LIG1	0.550978	7.66437e-31	3.56482e-30
LIHC (n=371)	PIH1D1	0.630476	1.65485e-42	1.27296e-41
LIHC (n=371)	PRMT1	0.713381	6.0606e-59	1.21212e-57
LIHC (n=371)	PRPF31	0.632416	7.78066e-43	6.22453e-42
LUAD (n=515)	BBC3	0.571423	5.65628e-46	5.95398e-45
LUAD (n=515)	LIG1	0.493203	6.34656e-33	3.34029e-32
LUAD (n=515)	PIH1D1	0.539648	2.94311e-40	2.10222e-39
LUAD (n=515)	PRMT1	0.520161	4.831e-37	3.01938e-36
LUAD (n=515)	PRPF31	0.579292	1.73339e-47	2.31118e-46
LUSC (n=501)	BBC3	0.447496	4.8434e-26	1.67014e-25
LUSC (n=501)	LIG1	0.523858	1.17774e-36	7.1378e-36
LUSC (n=501)	PIH1D1	0.538046	6.10847e-39	4.21273e-38
LUSC (n=501)	PRMT1	0.432699	2.8181e-24	8.80657e-24
LUSC (n=501)	PRPF31	0.666115	1.51674e-65	3.37053e-64
MESO (n=87)	BBC3	0.71313	9.2429e-15	1.96657e-14
MESO (n=87)	LIG1	0.419206	5.3146e-05	6.25246e-05
MESO (n=87)	PIH1D1	0.530346	1.26935e-07	1.75083e-07
MESO (n=87)	PRMT1	0.512594	3.86101e-07	5.25307e-07
MESO (n=87)	PRPF31	0.619487	1.58669e-10	2.51856e-10
OV (n=303)	BBC3	0.356993	1.54779e-10	2.47647e-10
OV (n=303)	LIG1	0.352367	2.75718e-10	4.30809e-10
OV (n=303)	PIH1D1	0.603042	2.16169e-31	1.08085e-30
OV (n=303)	PRMT1	0.487863	1.59546e-19	4.14404e-19
OV (n=303)	PRPF31	0.415256	4.63858e-14	9.46649e-14
PAAD (n=179)	BBC3	0.495916	1.6811e-12	3.00197e-12
PAAD (n=179)	LIG1	0.4829	7.59559e-12	1.27657e-11
PAAD (n=179)	PIH1D1	0.633725	1.71874e-21	4.77427e-21
PAAD (n=179)	PRMT1	0.519934	8.74379e-14	1.6815e-13
PAAD (n=179)	PRPF31	0.565125	1.71016e-16	3.97711e-16
PCPG (n=181)	BBC3	0.448416	2.44553e-10	3.85123e-10
PCPG (n=181)	LIG1	0.487295	3.48672e-12	6.06386e-12
PCPG (n=181)	PIH1D1	0.654099	1.79284e-23	5.27307e-23
PCPG (n=181)	PRMT1	0.457797	9.20467e-11	1.49669e-10
PCPG (n=181)	PRPF31	0.642424	1.88856e-22	5.39589e-22
PRAD (n=498)	BBC3	0.306298	2.81283e-12	4.93479e-12
PRAD (n=498)	LIG1	0.207472	3.02399e-06	3.87691e-06
PRAD (n=498)	PIH1D1	0.453746	1.16115e-26	4.38169e-26
PRAD (n=498)	PRMT1	0.406371	3.17172e-21	8.68966e-21
PRAD (n=498)	PRPF31	0.427251	1.62442e-23	4.84902e-23
READ (n=166)	BBC3	0.346129	4.92733e-06	6.27685e-06
READ (n=166)	LIG1	0.436858	3.9962e-09	5.83387e-09
READ (n=166)	PIH1D1	0.366956	1.15674e-06	1.52203e-06
READ (n=166)	PRMT1	0.355964	2.5174e-06	3.24826e-06
READ (n=166)	PRPF31	0.408974	4.48522e-08	6.27304e-08
SARC (n=260)	BBC3	0.38451	1.37513e-10	2.21795e-10
SARC (n=260)	LIG1	0.015795	0.799901	0.799901
SARC (n=260)	PIH1D1	0.27025	9.90825e-06	1.20832e-05
SARC (n=260)	PRMT1	0.356316	3.36052e-09	4.94195e-09
SARC (n=260)	PRPF31	0.262575	1.79484e-05	2.17557e-05
SKCM (n=471)	BBC3	0.394011	6.08304e-19	1.54001e-18
SKCM (n=471)	LIG1	0.337104	5.57322e-14	1.09279e-13
SKCM (n=471)	PIH1D1	0.341208	2.63456e-14	5.43208e-14
SKCM (n=471)	PRMT1	0.38821	2.16747e-18	5.35178e-18
SKCM (n=471)	PRPF31	0.350251	4.85726e-15	1.06511e-14
SKCM-Metastasis (n=368)	BBC3	0.43975	7.80444e-19	1.95111e-18
SKCM-Metastasis (n=368)	LIG1	0.3176	4.54553e-10	7.04734e-10
SKCM-Metastasis (n=368)	PIH1D1	0.329626	8.93721e-11	1.46512e-10
SKCM-Metastasis (n=368)	PRMT1	0.38998	8.14815e-15	1.75229e-14
SKCM-Metastasis (n=368)	PRPF31	0.3316	6.79662e-11	1.12341e-10
SKCM-Primary (n=103)	BBC3	0.215317	0.0289444	0.030629
SKCM-Primary (n=103)	LIG1	0.40769	1.91702e-05	2.30966e-05
SKCM-Primary (n=103)	PIH1D1	0.374083	9.92145e-05	0.00011604
SKCM-Primary (n=103)	PRMT1	0.368559	0.000127846	0.00014695
SKCM-Primary (n=103)	PRPF31	0.393314	3.95832e-05	4.71228e-05
STAD (n=415)	BBC3	0.529566	2.2464e-31	1.0958e-30
STAD (n=415)	LIG1	0.468334	5.16752e-24	1.56591e-23
STAD (n=415)	PIH1D1	0.525339	8.1091e-31	3.68596e-30
STAD (n=415)	PRMT1	0.509042	9.69398e-29	4.03916e-28
STAD (n=415)	PRPF31	0.501422	8.32067e-28	3.39619e-27
TGCT (n=150)	BBC3	0.647821	3.25505e-19	8.34627e-19
TGCT (n=150)	LIG1	0.0730326	0.374451	0.380153
TGCT (n=150)	PIH1D1	0.447143	9.68057e-09	1.38294e-08
TGCT (n=150)	PRMT1	0.622081	1.95268e-17	4.76263e-17
TGCT (n=150)	PRPF31	0.410623	1.79837e-07	2.46351e-07
THCA (n=509)	BBC3	0.605678	2.80597e-52	4.31687e-51
THCA (n=509)	LIG1	0.11974	0.00683949	0.0073543
THCA (n=509)	PIH1D1	0.141908	0.00132741	0.0014749
THCA (n=509)	PRMT1	0.133164	0.0026095	0.00285192
THCA (n=509)	PRPF31	0.0707026	0.111116	0.113965
THYM (n=120)	BBC3	0.435357	6.71789e-07	8.89787e-07
THYM (n=120)	LIG1	0.722189	1.29763e-20	3.41481e-20
THYM (n=120)	PIH1D1	0.787826	1.34444e-26	4.97939e-26
THYM (n=120)	PRMT1	0.394472	8.26683e-06	1.02694e-05
THYM (n=120)	PRPF31	0.619201	4.75755e-14	9.5458e-14
UCEC (n=545)	BBC3	0.564642	3.2462e-47	3.81906e-46
UCEC (n=545)	LIG1	0.429334	7.49248e-26	2.45655e-25
UCEC (n=545)	PIH1D1	0.570561	2.17764e-48	3.11091e-47
UCEC (n=545)	PRMT1	0.384879	1.09804e-20	2.92811e-20
UCEC (n=545)	PRPF31	0.414406	4.97133e-24	1.52964e-23
UCS (n=57)	BBC3	0.244555	0.0667438	0.0691645
UCS (n=57)	LIG1	0.490537	0.000107197	0.000124648
UCS (n=57)	PIH1D1	0.404395	0.00180907	0.00199897
UCS (n=57)	PRMT1	0.301141	0.0228271	0.0242842
UCS (n=57)	PRPF31	0.169497	0.207501	0.211736
UVM (n=80)	BBC3	0.220886	0.0489572	0.0512641
UVM (n=80)	LIG1	0.612189	1.60093e-09	2.37174e-09
UVM (n=80)	PIH1D1	0.398289	0.000253242	0.00028942
UVM (n=80)	PRMT1	0.478012	7.32004e-06	9.15005e-06
UVM (n=80)	PRPF31	0.700188	4.90145e-13	9.07676e-13
